# Supplementary material for: Experimental and Computational Analysis of a Large Protein Network That Controls Fat Storage Reveals the Design Principles of a Signaling Network
Source: PLoS Comput Biol. 2015 May 28;11(5):e1004264. doi: 10.1371/journal.pcbi.1004264 (PMC4447291; doi:10.1371/journal.pcbi.1004264)
Supplement: S1 Table — (XLSX) [file pcbi.1004264.s006.xlsx]

## Sheet: Sheet1
	Lipids (mg)	Proteins (mg)	Fat/Proteins	T-test
wt (BY4730)	2.02 +/- 0.02	8.03 +/- 0.23	0.251557
Energy level detection:
mth1	3.12 +/- 0.04	7.95 +/- 0.15	0.392453	0.000575421
elm1	2.21 +/- 0.10	6.5 +/- 0.11	0.34	0.00590876
sak1	3.01 +/- 0.05	7.1 +/- 0.09	0.423944	0.00357347
sip1	3.08 +/- 0.09	7.1 +/- 1.09	0.433803	0.0012341
snf1	5.15 +/- 0.08	6.95 +/- 0.08	0.741007	5.69614e-05
snf4	4.42 +/- 0.16	5.89 +/- 0.09	0.750424	5.56135e-05
tos3	3.34 +/- 0.20	8.09 +/- 0.51	0.4175	0.00591298
Autophagy:
atg5	2.69 +/- 0.09	7.5 +/- 0.12	0.358667	0.00093962
tco89	3.74 +/- 0.06	6.28 +/- 0.26	0.595541	0.00306279
tor1	2.79 +/- 0.05	8.57 +/- 0.27	0.325554	0.0056716
vma2	4.17 +/- 0.15	7.37 +/- 0.25	0.565807	0.0009316
vma4	3.82 +/- 0.13	8.03 +/- 0.40	0.475716	0.000196202
vma5	4.75 +/- 0.04	7.65 +/- 0.59	0.620915	0.00396202
vma6	4.48 +/- 0.12	7.31 +/- 0.12	0.612859	9.6716e-05
vma7	4.6 +/- 0.13	8.59 +/- 0.73	0.535506	0.000202252
vma8	4.48 +/- 0.14	7.36 +/- 0.65	0.608696	3.15672e-05
vma11	5.22 +/- 0.14	8.79 +/- 0.35	0.593857	9.316e-05
vma13	4.96 +/- 0.04	10.03 +/- 1.6	0.494516	9.15672e-05
vps30	2.96 +/- 0.04	9.01 +/- 1.6	0.328524	1.8148e-05
MAP Kinase pathway:
bck1	4.62 +/- 0.1	7.07 +/- 0.45	0.653465	0.00032271
bem1	5.82 +/- 0.07	6.09 +/- 0.49	0.955665	0.000397532
cla4	5.22 +/- 0.06	9.03 +/- 0.51	0.578073	0.00101457
fus3	3.42 +/- 0.07	9.1 +/- 0.22	0.375824	0.005014
hog1	4.13 +/- 0.12	8.5 +/- 0.35	0.485882	0.0010231
kss1	4.11 +/- 0.13	8.76 +/- 0.15	0.469178	0.00214558
mkk2	3.51 +/- 0.09	7.76 +/- 0.16	0.45232	0.00134136
msb2	3.15 +/- 0.10	9.1 +/- 0.17	0.346154	0.00100015
opy2	2.95 +/- 0.01	8.06 +/- 0.18	0.366005	0.00101457
pbs2	4.28 +/- 0.04	7.92 +/- 0.19	0.540404	0.00667961
ptc1	3.27 +/- 0.05	5.59 +/- 0.65	0.584973	0.00036747
ptp3	3.02 +/- 0.08	8.1 +/- 0.15	0.37284	0.00569613
sho1	2.76 +/- 0.08	8.5 +/- 0.35	0.324706	0.00689614
slt2	2.96 +/- 0.15	8.25 +/- 0.36	0.358788	0.00628735
ste5	2.42 +/- 0.08	7.52 +/- 0.33	0.321809	0.00166961
ste11	2.73 +/- 0.04	7.45 +/- 0.14	0.366443	0.00116676
ste20	4.13 +/- 0.04	9.31 +/- 0.51	0.443609	0.00093962
ste50	4.08 +/- 0.05	8.09 +/- 0.60	0.504326	0.000102092
mRNA degradation:
ccr4	3.21 +/- 0.05	6.23 +/- 0.39	0.515249	0.000121074
dhh1	4.53 +/- 0.07	7.93 +/- 0.22	0.571248	0.00120747
eap1	3.56 +/- 0.13	7.44 +/- 0.35	0.478495	0.00121074
hpr1	4.23 +/- 0.07	7.19 +/- 0.39	0.588317	1.23619e-05
lsm1	3.37 +/- 0.13	5.77 +/- 0.15	0.584055	0.000379311
lsm6	3.39 +/- 0.14	6.76 +/- 0.23	0.501479	0.000393113
pan2	3.12 +/- 0.14	9.03 +/- 1.7	0.345515	0.00121074
pan3	2.91 +/- 0.15	8.03 +/- 0.18	0.362391	0.00107406
pop2	4.18 +/- 0.17	5.74 +/- 0.23	0.728223	0.000121074
ski3	2.69 +/- 0.08	7.04 +/- 0.10	0.382102	0.0012466
ssd1	2.64 +/- 0.09	8.0 +/- 0.10	0.33	0.000802903
xrn1	5.61 +/- 0.13	8.33 +/- 0.71	0.673469	3.15672e-06
Ubiiquitin pathway:
bull1	3.25 +/- 0.2	6.39 +/- 0.07	0.508607	0.00254948
mot2	4.53 +/- 0.15	11.03 +/- 1.6	0.410698	0.0010151
mms22	3.49 +/- 0.07	10.03 +/- 1.08	0.347956	0.00101902
Lipid synthesis:
erg3	2.59 +/- 0.12	7.54 +/- 0.93	0.343501	0.000101069
erg4	3.21 +/- 0.04	7.33 +/- 0.09	0.437926	0.00147905
erg23	3.12 +/- 0.08	7.6 +/- 0.77	0.410526	0.00274343
hmg1	2.83 +/- 0.14	8.07 +/- 0.06	0.350682	0.000251016
opi3	4.74 +/- 0.03	7.81 +/- 0.54	0.606914	0.000175035
sur4	3.42 +/- 0.16	8.11 +/- 1.54	0.421702	1.77714e-06
Golgi & vesicle trafficking:
ent5	2.81 +/- 0.12	8.12 +/- 0.04	0.346059	0.000521446
mnn2	2.8 +/- 0.14	7.49 +/- 0.15	0.373832	0.000144595
las21	4.23 +/- 0.09	8.29 +/- 0.06	0.510253	0.000221446
scs2	3.44 +/- 0.08	8.06 +/- 0.31	0.426799	0.0018337
sso1	3.32 +/- 0.24	6.53 +/- 0.39	0.508423	0.00665179
vps16	3.29 +/- 0.15	8.23 +/- 0.70	0.399757	0.0138503
vps51	2.66 +/- 0.08	6.66 +/- 0.81	0.399399	0.00985031
Transcription regulators:
ctk1	4.92 +/- 0.16	8.42 +/- 0.12	0.584323	4.25672e-05
elp3	3.15 +/- 0.12	6.35 +/- 0.24	0.496063	0.000129292
hhf1	4.45 +/- 0.06	7.02 +/- 0.25	0.633903	0.000672
hmo1	2.91 +/- 0.08	6.88 +/- 0.84	0.422965	0.003672
hot1	2.81 +/- 0.09	7.77 +/- 0.85	0.361647	3.25672e-05
ino2	5.59 +/- 0.03	6.59 +/- 0.14	0.848255	0.000103172
msn2	4.19 +/- 0.04	8.15 +/- 0.03	0.51411	0.000172
sko1	3.19 +/- 0.09	8.13 +/- 1.02	0.392374	0.0001252
snf2	4.01 +/- 0.11	10.3 +/- 1.1	0.38932	0.000233032
snf5	4.05 +/- 0.01	9.33 +/- 1.02	0.434084	0.000403172
snf6	3.15 +/- 0.14	10.03 +/- 0.9	0.314058	0.000330317
srb5	5.16 +/- 0.02	9.02 +/- 0.14	0.572062	0.000987
stp1	3.16 +/- 0.08	9.41 +/- 0.21	0.335813	0.000303172
spt10	9.31 +/- 0.02	7.7 +/- 0.103	1.20779	3.55672e-05
swi4	4.81 +/- 0.04	9.3 +/- 0.54	0.516129	5.5672e-05
swi6	4.46 +/- 0.04	8.33 +/- 0.16	0.535414	9.72e-05
yta7	3.43 +/- 0.04	8.13 +/- 0.54	0.421894	6.72e-07
Miscellanies:
ckb1	5.28 +/- 0.13	9.55 +/- 0.09	0.55288	0.0045434
ice2	4.64 +/- 0.02	9.21 +/- 0.99	0.5038	7.25344e-05
Rvs161	3.38 +/- 0.13	7.07 +/- 0.4	0.478076	0.001444
rnq1	3.45 +/- 0.1	9.44 +/- 1.50	0.365466	0.0045434
Genes not present in the collection:
acc1
cdc39
cdc42
fas1
fas2
kog1
lst8
ste12
