# Supplementary material for: Experimental and Computational Analysis of a Large Protein Network That Controls Fat Storage Reveals the Design Principles of a Signaling Network
Source: PLoS Comput Biol. 2015 May 28;11(5):e1004264. doi: 10.1371/journal.pcbi.1004264 (PMC4447291; doi:10.1371/journal.pcbi.1004264)
Supplement: S3 Table — (XLS) [file pcbi.1004264.s008.xls]

## Sheet: Gene Ontology Fat Storage.txt
GO term	p-value	genes
growth	2.11e-12	YBL016W,YBR289W,YCL032W,YCR093W,YDR103W,YDR477W,YER118C,YER129W,YGR014W,YGR040W,YGR270W,YHL007C,YHR084W,YHR186C,YJR066W,YKL048C,YKL204W,YKR020W,YLR229C,YLR362W,YNL006W,YOR290C,YPL180W,YPR075C
biological regulation	2.28e-10	YAL021C,YBL016W,YBR009C,YBR127C,YBR289W,YCL032W,YCR093W,YDL006W,YDL160C,YDR103W,YDR123C,YDR138W,YDR174W,YDR277C,YDR293C,YDR422C,YDR463W,YDR477W,YEL051W,YER068W,YER075C,YER111C,YER118C,YER120W,YGL019W,YGL115W,YGL173C,YGR014W,YGR020C,YGR040W,YGR104C,YGR270W,YHL007C,YHL025W,YHR030C,YHR084W,YHR186C,YIL090W,YJL095W,YJL127C,YJL128C,YJR066W,YKL048C,YKL080W,YKL139W,YKL204W,YKR020W,YLR113W,YLR182W,YLR229C…
protein phosphorylation	3.92e-09	YBL016W,YDL006W,YDR103W,YDR422C,YDR477W,YER075C,YER129W,YGL019W,YGL115W,YGL179C,YGR040W,YHL007C,YHR030C,YJL095W,YJL128C,YJR066W,YKL025C,YKL048C,YKL139W,YLR113W,YLR362W,YNL298W,YPL140C
MAPK cascade	1.3e-08	YBL016W,YCL032W,YDL006W,YDR103W,YER075C,YGR040W,YHL007C,YHR030C,YJL128C,YLR113W,YLR362W
response to osmotic stress	1.5e-08	YCL032W,YCR009C,YDL006W,YER075C,YER118C,YGR014W,YHL007C,YJL128C,YKL048C,YLR113W,YLR362W,YMR037C,YMR172W,YNL167C,YPL180W,YPR075C
filamentous growth	1.84e-08	YBL016W,YBR289W,YCL032W,YCR093W,YDR103W,YDR477W,YER118C,YER129W,YGR014W,YGR040W,YGR270W,YHL007C,YHR084W,YKL048C,YLR229C,YLR362W,YOR290C,YPR075C
signal transduction by phosphorylation	1.95e-08	YBL016W,YCL032W,YDL006W,YDR103W,YER075C,YGR040W,YHL007C,YHR030C,YJL128C,YLR113W,YLR362W
response to abiotic stimulus	5.79e-08	YCL032W,YCR009C,YDL006W,YER075C,YER111C,YER118C,YGR014W,YHL007C,YHR030C,YJL095W,YJL128C,YKL048C,YLR113W,YLR182W,YLR362W,YMR037C,YMR172W,YNL167C,YPL180W,YPR075C
regulation of cellular process	1.4e-07	YAL021C,YBL016W,YBR009C,YBR289W,YCL032W,YCR093W,YDL006W,YDL160C,YDR103W,YDR123C,YDR138W,YDR174W,YDR277C,YDR293C,YDR422C,YDR463W,YDR477W,YER068W,YER075C,YER111C,YER118C,YER120W,YGL019W,YGL115W,YGL173C,YGR014W,YGR040W,YGR104C,YGR270W,YHL007C,YHL025W,YHR030C,YHR084W,YHR186C,YJL095W,YJL127C,YJL128C,YJR066W,YKL048C,YKL139W,YKL204W,YLR113W,YLR182W,YLR229C,YLR362W,YMR037C,YMR172W,YNL006W,YNL167C,YNL298W…
osmosensory signaling pathway	9.58e-07	YCL032W,YER118C,YGR014W,YHL007C,YJL128C,YLR113W,YLR362W,YPR075C
regulation of biological process	1.39387e-06	YAL021C,YBL016W,YBR009C,YBR289W,YCL032W,YCR093W,YDL006W,YDL160C,YDR103W,YDR123C,YDR138W,YDR174W,YDR277C,YDR293C,YDR422C,YDR463W,YDR477W,YER068W,YER075C,YER111C,YER118C,YER120W,YGL019W,YGL115W,YGL173C,YGR014W,YGR040W,YGR104C,YGR270W,YHL007C,YHL025W,YHR030C,YHR084W,YHR186C,YJL095W,YJL127C,YJL128C,YJR066W,YKL048C,YKL139W,YKL204W,YLR113W,YLR182W,YLR229C,YLR362W,YMR037C,YMR172W,YNL006W,YNL167C,YNL298W…
cell communication	1.40105e-06	YBL016W,YBR289W,YCL032W,YDL006W,YDR103W,YDR277C,YDR422C,YDR477W,YER075C,YER118C,YGR014W,YGR040W,YHL007C,YHR030C,YHR186C,YJL095W,YJL128C,YJR066W,YLR113W,YLR229C,YLR362W,YMR037C,YNL006W,YOR290C,YPL140C,YPL149W,YPL180W,YPR075C
cellular response to osmotic stress	1.63312e-06	YCL032W,YER118C,YGR014W,YHL007C,YJL128C,YLR113W,YLR362W,YMR037C,YMR172W,YNL167C,YPR075C
response to stimulus	1.99848e-06	YBL016W,YBR200W,YBR289W,YCL032W,YCR009C,YCR093W,YDL006W,YDR103W,YDR138W,YDR277C,YDR422C,YDR477W,YER075C,YER111C,YER118C,YGL019W,YGL094C,YGR014W,YGR040W,YHL007C,YHL025W,YHR030C,YHR084W,YHR186C,YJL095W,YJL127C,YJL128C,YJR066W,YKL025C,YKL048C,YKL139W,YLR113W,YLR182W,YLR229C,YLR320W,YLR362W,YMR037C,YMR172W,YNL006W,YNL167C,YNL298W,YOR290C,YPL140C,YPL149W,YPL180W,YPR075C,YPR189W
signal transduction	2.56645e-06	YBL016W,YCL032W,YDL006W,YDR103W,YDR277C,YDR422C,YER075C,YER118C,YGR014W,YGR040W,YHL007C,YHR030C,YHR186C,YJL095W,YJL128C,YJR066W,YLR113W,YLR229C,YLR362W,YNL006W,YPL140C,YPL180W,YPR075C
single organism signaling	2.56645e-06	YBL016W,YCL032W,YDL006W,YDR103W,YDR277C,YDR422C,YER075C,YER118C,YGR014W,YGR040W,YHL007C,YHR030C,YHR186C,YJL095W,YJL128C,YJR066W,YLR113W,YLR229C,YLR362W,YNL006W,YPL140C,YPL180W,YPR075C
signaling	2.75545e-06	YBL016W,YCL032W,YDL006W,YDR103W,YDR277C,YDR422C,YER075C,YER118C,YGR014W,YGR040W,YHL007C,YHR030C,YHR186C,YJL095W,YJL128C,YJR066W,YLR113W,YLR229C,YLR362W,YNL006W,YPL140C,YPL180W,YPR075C
cellular response to stimulus	2.89389e-06	YBL016W,YBR200W,YBR289W,YCL032W,YCR093W,YDL006W,YDR103W,YDR138W,YDR277C,YDR422C,YDR477W,YER075C,YER111C,YER118C,YGL019W,YGL094C,YGR014W,YGR040W,YHL007C,YHL025W,YHR030C,YHR084W,YHR186C,YJL095W,YJL127C,YJL128C,YJR066W,YKL025C,YKL139W,YLR113W,YLR182W,YLR229C,YLR320W,YLR362W,YMR037C,YMR172W,YNL006W,YNL167C,YOR290C,YPL140C,YPL149W,YPL180W,YPR075C
filamentous growth of a population of unicellular organisms	3.39585e-06	YBL016W,YBR289W,YCR093W,YDR103W,YDR477W,YER129W,YGR040W,YGR270W,YHL007C,YHR084W,YKL048C,YLR229C,YLR362W,YOR290C,YPR075C
multi-organism cellular process	5.30978e-06	YBL016W,YBR200W,YCL032W,YCR009C,YCR093W,YDL006W,YDR103W,YDR477W,YER075C,YGR040W,YHL007C,YHR084W,YLR229C,YLR362W,YOR290C,YPR075C
phosphorylation	8.36342e-06	YBL016W,YCL032W,YDL006W,YDR103W,YDR422C,YDR477W,YER075C,YER129W,YGL019W,YGL115W,YGL179C,YGR040W,YHL007C,YHR030C,YJL095W,YJL128C,YJR066W,YKL025C,YKL048C,YKL139W,YLR113W,YLR362W,YNL298W,YPL140C
regulation of growth	1.0371e-05	YBR289W,YDR477W,YGR270W,YHR186C,YJR066W,YKL204W,YLR229C,YNL006W,YOR290C,YPL180W,YPR075C
positive regulation of cellular metabolic process	1.25563e-05	YAL021C,YBR289W,YCR093W,YDR103W,YDR123C,YDR463W,YDR477W,YER068W,YER111C,YGL115W,YGL173C,YGR104C,YGR270W,YHL007C,YHL025W,YHR084W,YJL128C,YKL048C,YKL139W,YLR113W,YLR182W,YLR362W,YMR037C,YMR172W,YNL167C,YNR052C,YOR290C
growth of unicellular organism as a thread of attached cells	2.02996e-05	YBL016W,YBR289W,YCR093W,YDR103W,YDR477W,YER129W,YGR040W,YGR270W,YHL007C,YHR084W,YKL048C,YLR229C,YLR362W,YOR290C
pheromone-dependent signal transduction involved in conjugation with cellular fusion	2.03167e-05	YBL016W,YCL032W,YDL006W,YDR103W,YER075C,YGR040W,YHL007C,YLR229C,YLR362W
signal transduction involved in conjugation with cellular fusion	2.03167e-05	YBL016W,YCL032W,YDL006W,YDR103W,YER075C,YGR040W,YHL007C,YLR229C,YLR362W
cellular response to abiotic stimulus	2.32047e-05	YCL032W,YER118C,YGR014W,YHL007C,YJL128C,YLR113W,YLR362W,YMR037C,YMR172W,YNL167C,YPR075C
positive regulation of cellular process	2.52704e-05	YAL021C,YBR289W,YCR093W,YDR103W,YDR123C,YDR463W,YDR477W,YER068W,YER111C,YGL115W,YGL173C,YGR104C,YGR270W,YHL007C,YHL025W,YHR084W,YJL128C,YKL048C,YKL139W,YLR113W,YLR182W,YLR229C,YLR362W,YMR037C,YMR172W,YNL167C,YNL298W,YNR052C,YOR290C
response to pheromone	2.60944e-05	YBL016W,YBR200W,YCL032W,YCR093W,YDL006W,YDR103W,YER075C,YGR040W,YHL007C,YHR084W,YLR229C,YLR362W,YNL298W,YPR075C
energy coupled proton transmembrane transport, against electrochemical gradient	2.6377e-05	YBR127C,YGR020C,YKL080W,YLR447C,YOR332W,YPL234C,YPR036W
ATP hydrolysis coupled proton transport	2.6377e-05	YBR127C,YGR020C,YKL080W,YLR447C,YOR332W,YPL234C,YPR036W
signal transduction involved in filamentous growth	3.03049e-05	YCL032W,YER118C,YGR014W,YGR040W,YHL007C,YLR362W
invasive growth in response to glucose limitation	3.38471e-05	YBL016W,YBR289W,YDR103W,YDR477W,YGR040W,YGR270W,YHL007C,YHR084W,YLR229C,YLR362W,YOR290C
intracellular signal transduction	4.93736e-05	YBL016W,YCL032W,YDL006W,YDR103W,YER075C,YGR040W,YHL007C,YHR030C,YHR186C,YJL095W,YJL128C,YJR066W,YLR113W,YLR229C,YLR362W,YNL006W,YPL180W
vacuolar acidification	5.34549e-05	YBR127C,YEL051W,YGR020C,YKL080W,YLR447C,YOR332W,YPL234C,YPR036W
pH reduction	5.34549e-05	YBR127C,YEL051W,YGR020C,YKL080W,YLR447C,YOR332W,YPL234C,YPR036W
intracellular pH reduction	5.34549e-05	YBR127C,YEL051W,YGR020C,YKL080W,YLR447C,YOR332W,YPL234C,YPR036W
response to stress	6.39155e-05	YBR289W,YCL032W,YCR009C,YDL006W,YDR138W,YDR477W,YER075C,YER111C,YER118C,YGL019W,YGL094C,YGR014W,YHL007C,YHL025W,YHR030C,YHR186C,YJL095W,YJL127C,YJL128C,YJR066W,YKL025C,YKL048C,YKL139W,YLR113W,YLR182W,YLR320W,YLR362W,YMR037C,YMR172W,YNL167C,YOR290C,YPL149W,YPL180W,YPR075C,YPR189W
positive regulation of biological process	6.89458e-05	YAL021C,YBL016W,YBR289W,YCR093W,YDR103W,YDR123C,YDR463W,YDR477W,YER068W,YER111C,YGL115W,YGL173C,YGR104C,YGR270W,YHL007C,YHL025W,YHR084W,YJL128C,YKL048C,YKL139W,YLR113W,YLR182W,YLR229C,YLR362W,YMR037C,YMR172W,YNL167C,YNL298W,YNR052C,YOR290C,YPR075C
invasive filamentous growth	6.90507e-05	YBL016W,YBR289W,YDR103W,YDR477W,YGR040W,YGR270W,YHL007C,YHR084W,YLR229C,YLR362W,YOR290C
cellular response to pheromone	7.14421e-05	YBL016W,YBR200W,YCL032W,YCR093W,YDL006W,YDR103W,YER075C,YGR040W,YHL007C,YHR084W,YLR229C,YLR362W,YPR075C
regulation of cellular pH	7.47131e-05	YBR127C,YEL051W,YGR020C,YKL080W,YLR447C,YOR332W,YPL234C,YPR036W
regulation of intracellular pH	7.47131e-05	YBR127C,YEL051W,YGR020C,YKL080W,YLR447C,YOR332W,YPL234C,YPR036W
conjugation with cellular fusion	8.47696e-05	YBL016W,YBR200W,YCL032W,YCR009C,YCR093W,YDL006W,YDR103W,YER075C,YGR040W,YHL007C,YHR084W,YLR229C,YLR362W,YPR075C
conjugation	9.47418e-05	YBL016W,YBR200W,YCL032W,YCR009C,YCR093W,YDL006W,YDR103W,YER075C,YGR040W,YHL007C,YHR084W,YLR229C,YLR362W,YPR075C
positive regulation of macromolecule metabolic process	0.000102017	YAL021C,YBR289W,YCR093W,YDR103W,YDR123C,YDR463W,YER068W,YER111C,YGL173C,YGR104C,YGR270W,YHL007C,YHL025W,YHR084W,YJL128C,YKL048C,YKL139W,YLR113W,YLR182W,YLR362W,YMR037C,YMR172W,YNL167C,YNR052C,YOR290C
response to pheromone involved in conjugation with cellular fusion	0.000111651	YBL016W,YBR200W,YCL032W,YCR093W,YDL006W,YDR103W,YER075C,YGR040W,YHL007C,YLR229C,YLR362W,YPR075C
regulation of macromolecule metabolic process	0.000206863	YAL021C,YBR009C,YBR289W,YCR093W,YDL006W,YDL160C,YDR103W,YDR123C,YDR138W,YDR174W,YDR293C,YDR463W,YDR477W,YER068W,YER075C,YER111C,YER120W,YGL019W,YGL115W,YGL173C,YGR040W,YGR104C,YGR270W,YHL007C,YHL025W,YHR084W,YJL127C,YJL128C,YJR066W,YKL048C,YKL139W,YKL204W,YLR113W,YLR182W,YLR362W,YMR037C,YMR172W,YNL167C,YNL298W,YNR052C,YOR290C,YPL086C
regulation of transcription from RNA polymerase II promoter	0.000215382	YAL021C,YBR009C,YBR289W,YCR093W,YDR123C,YDR174W,YDR463W,YER068W,YER111C,YGL115W,YGL173C,YGR104C,YGR270W,YHL025W,YHR084W,YJL127C,YKL139W,YLR113W,YLR182W,YMR037C,YMR172W,YNL167C,YNR052C,YOR290C,YPL086C
cellular response to organic substance	0.000221842	YBL016W,YBR200W,YCL032W,YCR093W,YDL006W,YDR103W,YER075C,YGR040W,YHL007C,YHR030C,YHR084W,YJL095W,YLR229C,YLR362W,YMR037C,YPR075C
regulation of pH	0.000249473	YBR127C,YEL051W,YGR020C,YKL080W,YLR447C,YOR332W,YPL234C,YPR036W
cell growth	0.000249835	YCR093W,YDR477W,YER129W,YHL007C,YHR084W,YHR186C,YJR066W,YKL048C,YLR229C,YLR362W,YNL006W,YPL180W
G-protein coupled receptor signaling pathway	0.000314451	YBL016W,YCL032W,YDL006W,YDR103W,YER075C,YGR040W,YHL007C,YLR229C,YLR362W
multi-organism process	0.000333318	YBL016W,YBR009C,YBR200W,YCL032W,YCR009C,YCR093W,YDL006W,YDR103W,YDR477W,YER075C,YGR040W,YHL007C,YHR084W,YLR229C,YLR362W,YOR290C,YPL232W,YPR075C,YPR189W
positive regulation of transcription from RNA polymerase II promoter	0.00035559	YAL021C,YBR289W,YCR093W,YDR123C,YDR463W,YER068W,YER111C,YGL173C,YGR104C,YGR270W,YHL025W,YHR084W,YLR113W,YLR182W,YMR037C,YMR172W,YNL167C,YNR052C,YOR290C
regulation of MAPK cascade	0.000357363	YBL016W,YDL006W,YDR103W,YER075C,YHL007C,YJL128C,YLR362W
cell surface receptor signaling pathway	0.000386843	YBL016W,YCL032W,YDL006W,YDR103W,YER075C,YGR040W,YHL007C,YLR229C,YLR362W
cellular response to stress	0.000403889	YBR289W,YCL032W,YDL006W,YDR138W,YDR477W,YER075C,YER111C,YER118C,YGL019W,YGL094C,YGR014W,YHL007C,YHL025W,YHR030C,YHR186C,YJL095W,YJL127C,YJL128C,YJR066W,YKL025C,YKL139W,YLR113W,YLR182W,YLR320W,YLR362W,YMR037C,YMR172W,YNL167C,YOR290C,YPL149W,YPR075C
regulation of cellular metabolic process	0.00042505	YAL021C,YBL016W,YBR009C,YBR289W,YCR093W,YDL006W,YDL160C,YDR103W,YDR123C,YDR138W,YDR174W,YDR293C,YDR463W,YDR477W,YER068W,YER075C,YER111C,YER120W,YGL019W,YGL115W,YGL173C,YGR040W,YGR104C,YGR270W,YHL007C,YHL025W,YHR084W,YJL127C,YJL128C,YJR066W,YKL048C,YKL139W,YKL204W,YLR113W,YLR182W,YLR362W,YMR037C,YMR172W,YNL167C,YNR052C,YOR290C,YPL086C
response to organic substance	0.000462194	YBL016W,YBR200W,YCL032W,YCR093W,YDL006W,YDR103W,YER075C,YGR040W,YHL007C,YHR030C,YHR084W,YJL095W,YLR229C,YLR362W,YMR037C,YNL298W,YPR075C
positive regulation of metabolic process	0.000574222	YAL021C,YBR289W,YCR093W,YDR103W,YDR123C,YDR463W,YDR477W,YER068W,YER111C,YGL115W,YGL173C,YGR104C,YGR270W,YHL007C,YHL025W,YHR084W,YJL128C,YKL048C,YKL139W,YLR113W,YLR182W,YLR362W,YMR037C,YMR172W,YNL167C,YNR052C,YOR290C
positive regulation of biosynthetic process	0.00060606	YAL021C,YBR289W,YCR093W,YDR123C,YDR463W,YDR477W,YER068W,YER111C,YGL115W,YGL173C,YGR104C,YGR270W,YHL025W,YHR084W,YKL139W,YLR113W,YLR182W,YMR037C,YMR172W,YNL167C,YNR052C,YOR290C
positive regulation of cellular biosynthetic process	0.00060606	YAL021C,YBR289W,YCR093W,YDR123C,YDR463W,YDR477W,YER068W,YER111C,YGL115W,YGL173C,YGR104C,YGR270W,YHL025W,YHR084W,YKL139W,YLR113W,YLR182W,YMR037C,YMR172W,YNL167C,YNR052C,YOR290C
regulation of primary metabolic process	0.000816255	YAL021C,YBR009C,YBR289W,YCR093W,YDL006W,YDL160C,YDR103W,YDR123C,YDR138W,YDR174W,YDR293C,YDR463W,YDR477W,YER068W,YER075C,YER111C,YER120W,YGL019W,YGL115W,YGL173C,YGR040W,YGR104C,YGR270W,YHL007C,YHL025W,YHR084W,YJL127C,YJL128C,YJR066W,YKL048C,YKL139W,YKL204W,YLR113W,YLR182W,YLR362W,YMR037C,YMR172W,YNL167C,YNR052C,YOR290C,YPL086C
positive regulation of transcription, DNA-templated	0.000868392	YAL021C,YBR289W,YCR093W,YDR123C,YDR463W,YER068W,YER111C,YGL173C,YGR104C,YGR270W,YHL025W,YHR084W,YKL139W,YLR113W,YLR182W,YMR037C,YMR172W,YNL167C,YNR052C,YOR290C
positive regulation of RNA biosynthetic process	0.000868392	YAL021C,YBR289W,YCR093W,YDR123C,YDR463W,YER068W,YER111C,YGL173C,YGR104C,YGR270W,YHL025W,YHR084W,YKL139W,YLR113W,YLR182W,YMR037C,YMR172W,YNL167C,YNR052C,YOR290C
positive regulation of nucleic acid-templated transcription	0.000868392	YAL021C,YBR289W,YCR093W,YDR123C,YDR463W,YER068W,YER111C,YGL173C,YGR104C,YGR270W,YHL025W,YHR084W,YKL139W,YLR113W,YLR182W,YMR037C,YMR172W,YNL167C,YNR052C,YOR290C
cellular monovalent inorganic cation homeostasis	0.00111133	YBR127C,YEL051W,YGR020C,YKL080W,YLR447C,YOR332W,YPL234C,YPR036W
positive regulation of RNA metabolic process	0.0013543	YAL021C,YBR289W,YCR093W,YDR123C,YDR463W,YER068W,YER111C,YGL173C,YGR104C,YGR270W,YHL025W,YHR084W,YKL139W,YLR113W,YLR182W,YMR037C,YMR172W,YNL167C,YNR052C,YOR290C
transcription from RNA polymerase II promoter	0.00138841	YAL021C,YBR009C,YBR289W,YCR093W,YDR123C,YDR138W,YDR174W,YDR463W,YER068W,YER111C,YGL115W,YGL173C,YGR104C,YGR270W,YHL025W,YHR084W,YJL127C,YKL139W,YLR113W,YLR182W,YMR037C,YMR172W,YNL167C,YNR052C,YOR290C,YPL086C
nuclear-transcribed mRNA catabolic process, deadenylation-dependent decay	0.00170942	YAL021C,YCR093W,YDL160C,YGL094C,YJL124C,YKL025C,YKL204W,YNR052C,YPR189W
cellular response to heat	0.00170942	YCL032W,YER111C,YER118C,YHL007C,YJL128C,YLR113W,YLR182W,YLR362W,YMR037C
regulation of gene expression	0.00231557	YAL021C,YBR009C,YBR289W,YCR093W,YDL160C,YDR123C,YDR138W,YDR174W,YDR293C,YDR463W,YDR477W,YER068W,YER111C,YER120W,YGL019W,YGL115W,YGL173C,YGR040W,YGR104C,YGR270W,YHL007C,YHL025W,YHR084W,YJL127C,YKL139W,YKL204W,YLR113W,YLR182W,YMR037C,YMR172W,YNL167C,YNL298W,YNR052C,YOR290C,YPL086C
osmosensory signaling pathway via Sho1 osmosensor	0.00243565	YCL032W,YGR014W,YHL007C,YLR362W
regulation of metabolic process	0.00260269	YAL021C,YBL016W,YBR009C,YBR289W,YCR093W,YDL006W,YDL160C,YDR103W,YDR123C,YDR138W,YDR174W,YDR293C,YDR463W,YDR477W,YER068W,YER075C,YER111C,YER120W,YGL019W,YGL115W,YGL173C,YGR040W,YGR104C,YGR270W,YHL007C,YHL025W,YHR084W,YJL127C,YJL128C,YJR066W,YKL048C,YKL139W,YKL204W,YLR113W,YLR182W,YLR362W,YMR037C,YMR172W,YNL167C,YNL298W,YNR052C,YOR290C,YPL086C
monovalent inorganic cation homeostasis	0.0031456	YBR127C,YEL051W,YGR020C,YKL080W,YLR447C,YOR332W,YPL234C,YPR036W
positive regulation of filamentous growth	0.00339197	YBR289W,YDR477W,YGR270W,YLR229C,YOR290C,YPR075C
positive regulation of filamentous growth of a population of unicellular organisms	0.00339197	YBR289W,YDR477W,YGR270W,YLR229C,YOR290C,YPR075C
positive regulation of nucleobase-containing compound metabolic process	0.00385166	YAL021C,YBR289W,YCR093W,YDR123C,YDR463W,YER068W,YER111C,YGL173C,YGR104C,YGR270W,YHL025W,YHR084W,YKL139W,YLR113W,YLR182W,YMR037C,YMR172W,YNL167C,YNR052C,YOR290C
positive regulation of growth	0.00477113	YBR289W,YDR477W,YGR270W,YLR229C,YOR290C,YPR075C
positive regulation of nitrogen compound metabolic process	0.0057129	YAL021C,YBR289W,YCR093W,YDR123C,YDR463W,YER068W,YER111C,YGL173C,YGR104C,YGR270W,YHL025W,YHR084W,YKL139W,YLR113W,YLR182W,YMR037C,YMR172W,YNL167C,YNR052C,YOR290C
phosphate-containing compound metabolic process	0.00582168	YBL016W,YBR127C,YCL032W,YDL006W,YDR103W,YDR123C,YDR422C,YDR477W,YER075C,YER120W,YER129W,YGL019W,YGL115W,YGL179C,YGR040W,YHL007C,YHR030C,YJL062W,YJL095W,YJL128C,YJR066W,YJR073C,YKL025C,YKL048C,YKL139W,YLR113W,YLR362W,YML075C,YNL298W,YNR016C,YPL140C
positive regulation of gene expression	0.00599368	YAL021C,YBR289W,YCR093W,YDR123C,YDR463W,YER068W,YER111C,YGL173C,YGR104C,YGR270W,YHL025W,YHR084W,YKL139W,YLR113W,YLR182W,YMR037C,YMR172W,YNL167C,YNR052C,YOR290C
nuclear-transcribed mRNA catabolic process	0.00617704	YAL021C,YCR093W,YDL160C,YER068W,YGL094C,YGL173C,YJL124C,YKL025C,YKL204W,YNR052C,YPR189W
positive regulation of macromolecule biosynthetic process	0.00691935	YAL021C,YBR289W,YCR093W,YDR123C,YDR463W,YER068W,YER111C,YGL173C,YGR104C,YGR270W,YHL025W,YHR084W,YKL139W,YLR113W,YLR182W,YMR037C,YMR172W,YNL167C,YNR052C,YOR290C
positive regulation of transcription from RNA polymerase II promoter in response to stress	0.00754171	YER111C,YLR113W,YLR182W,YMR037C,YMR172W,YNL167C,YOR290C
mRNA catabolic process	0.00836953	YAL021C,YCR093W,YDL160C,YER068W,YGL094C,YGL173C,YJL124C,YKL025C,YKL204W,YNR052C,YPR189W
regulation of macromolecule biosynthetic process	0.00852269	YAL021C,YBR009C,YBR289W,YCR093W,YDL160C,YDR123C,YDR138W,YDR174W,YDR293C,YDR463W,YDR477W,YER068W,YER111C,YER120W,YGL019W,YGL115W,YGL173C,YGR040W,YGR104C,YGR270W,YHL025W,YHR084W,YJL127C,YJR066W,YKL139W,YKL204W,YLR113W,YLR182W,YMR037C,YMR172W,YNL167C,YNR052C,YOR290C,YPL086C
phosphorus metabolic process	0.0124893	YBL016W,YBR127C,YCL032W,YDL006W,YDR103W,YDR123C,YDR422C,YDR477W,YER075C,YER120W,YER129W,YGL019W,YGL115W,YGL179C,YGR040W,YHL007C,YHR030C,YJL062W,YJL095W,YJL128C,YJR066W,YJR073C,YKL025C,YKL048C,YKL139W,YLR113W,YLR362W,YML075C,YNL298W,YNR016C,YPL140C
sexual reproduction	0.0126942	YBL016W,YBR009C,YBR200W,YCL032W,YCR009C,YCR093W,YDL006W,YDR103W,YER075C,YGR040W,YHL007C,YHR084W,YLR229C,YLR362W,YPL232W,YPR075C
multi-organism reproductive process	0.0126942	YBL016W,YBR009C,YBR200W,YCL032W,YCR009C,YCR093W,YDL006W,YDR103W,YER075C,YGR040W,YHL007C,YHR084W,YLR229C,YLR362W,YPL232W,YPR075C
nuclear-transcribed mRNA poly(A) tail shortening	0.0152271	YAL021C,YCR093W,YGL094C,YKL025C,YNR052C
regulation of cellular biosynthetic process	0.0184134	YAL021C,YBR009C,YBR289W,YCR093W,YDL160C,YDR123C,YDR138W,YDR174W,YDR293C,YDR463W,YDR477W,YER068W,YER111C,YER120W,YGL019W,YGL115W,YGL173C,YGR040W,YGR104C,YGR270W,YHL025W,YHR084W,YJL127C,YJR066W,YKL139W,YKL204W,YLR113W,YLR182W,YMR037C,YMR172W,YNL167C,YNR052C,YOR290C,YPL086C
reproductive process	0.0185653	YBL016W,YBR009C,YBR200W,YCL032W,YCR009C,YCR093W,YDL006W,YDR103W,YER075C,YGR040W,YHL007C,YHR084W,YLR229C,YLR362W,YOR290C,YPL232W,YPR075C
cellular protein modification process	0.018694	YBL016W,YBR009C,YBR015C,YDL006W,YDR103W,YDR422C,YDR477W,YER068W,YER075C,YER129W,YGL019W,YGL115W,YGL179C,YGR040W,YHL007C,YHR030C,YJL062W,YJL095W,YJL127C,YJL128C,YJR066W,YKL025C,YKL048C,YKL139W,YLR113W,YLR362W,YNL298W,YPL086C,YPL140C,YPL149W
protein modification process	0.018694	YBL016W,YBR009C,YBR015C,YDL006W,YDR103W,YDR422C,YDR477W,YER068W,YER075C,YER129W,YGL019W,YGL115W,YGL179C,YGR040W,YHL007C,YHR030C,YJL062W,YJL095W,YJL127C,YJL128C,YJR066W,YKL025C,YKL048C,YKL139W,YLR113W,YLR362W,YNL298W,YPL086C,YPL140C,YPL149W
regulation of biosynthetic process	0.018897	YAL021C,YBR009C,YBR289W,YCR093W,YDL160C,YDR123C,YDR138W,YDR174W,YDR293C,YDR463W,YDR477W,YER068W,YER111C,YER120W,YGL019W,YGL115W,YGL173C,YGR040W,YGR104C,YGR270W,YHL025W,YHR084W,YJL127C,YJR066W,YKL139W,YKL204W,YLR113W,YLR182W,YMR037C,YMR172W,YNL167C,YNR052C,YOR290C,YPL086C
response to heat	0.0192962	YCL032W,YER111C,YER118C,YHL007C,YJL128C,YLR113W,YLR182W,YLR362W,YMR037C
regulation of cellular macromolecule biosynthetic process	0.0219495	YAL021C,YBR009C,YBR289W,YCR093W,YDL160C,YDR123C,YDR138W,YDR174W,YDR293C,YDR463W,YDR477W,YER068W,YER111C,YER120W,YGL019W,YGL115W,YGL173C,YGR040W,YGR104C,YGR270W,YHL025W,YHR084W,YJL127C,YKL139W,YKL204W,YLR113W,YLR182W,YMR037C,YMR172W,YNL167C,YNR052C,YOR290C,YPL086C
long-chain fatty acid biosynthetic process	0.0275574	YKL182W,YNR016C,YPL231W
regulation of transcription, DNA-templated	0.0294957	YAL021C,YBR009C,YBR289W,YCR093W,YDR123C,YDR138W,YDR174W,YDR463W,YER068W,YER111C,YER120W,YGL019W,YGL115W,YGL173C,YGR040W,YGR104C,YGR270W,YHL025W,YHR084W,YJL127C,YKL139W,YLR113W,YLR182W,YMR037C,YMR172W,YNL167C,YNR052C,YOR290C,YPL086C
regulation of nucleic acid-templated transcription	0.0303735	YAL021C,YBR009C,YBR289W,YCR093W,YDR123C,YDR138W,YDR174W,YDR463W,YER068W,YER111C,YER120W,YGL019W,YGL115W,YGL173C,YGR040W,YGR104C,YGR270W,YHL025W,YHR084W,YJL127C,YKL139W,YLR113W,YLR182W,YMR037C,YMR172W,YNL167C,YNR052C,YOR290C,YPL086C
regulation of RNA biosynthetic process	0.0303735	YAL021C,YBR009C,YBR289W,YCR093W,YDR123C,YDR138W,YDR174W,YDR463W,YER068W,YER111C,YER120W,YGL019W,YGL115W,YGL173C,YGR040W,YGR104C,YGR270W,YHL025W,YHR084W,YJL127C,YKL139W,YLR113W,YLR182W,YMR037C,YMR172W,YNL167C,YNR052C,YOR290C,YPL086C
positive regulation of transcription from RNA polymerase II promoter in response to osmotic stress	0.0324637	YLR113W,YMR037C,YMR172W,YNL167C
response to temperature stimulus	0.0345047	YCL032W,YER111C,YER118C,YHL007C,YJL128C,YLR113W,YLR182W,YLR362W,YMR037C
regulation of RNA metabolic process	0.0496425	YAL021C,YBR009C,YBR289W,YCR093W,YDR123C,YDR138W,YDR174W,YDR463W,YER068W,YER111C,YER120W,YGL019W,YGL115W,YGL173C,YGR040W,YGR104C,YGR270W,YHL025W,YHR084W,YJL127C,YKL139W,YLR113W,YLR182W,YMR037C,YMR172W,YNL167C,YNR052C,YOR290C,YPL086C
