# Supplementary material for: Experimental and Computational Analysis of a Large Protein Network That Controls Fat Storage Reveals the Design Principles of a Signaling Network
Source: PLoS Comput Biol. 2015 May 28;11(5):e1004264. doi: 10.1371/journal.pcbi.1004264 (PMC4447291; doi:10.1371/journal.pcbi.1004264)
Supplement: S5 Table — (XLSX) [file pcbi.1004264.s010.xlsx]

## Sheet: Sheet1
Figure 3B				Figure 3C				Figure 3C
Class I				Class II				Class II
	Network Gg-P	Network L-P			Network Gg-P	Network L-P			Network Gg-P	Network L-P
Autophagy:				Energy level detection:				Energy level detection:
vma2	0.235955	3.15086		sak1	0.235955	3.13002		sak1	0.235955	3.13002
vma4	0.234637	3.14163		sip1	0.238636	3.01887		sip1	0.238636	3.01887
vps30	0.232044	3.12766		tos3	0.235955	3.2067		tos3	0.235955	3.2067
MAP Kinase pathway:				Autophagy:				Autophagy:
bem1	0.141732	3.16822		tor1	0.238095	3.2192		tor1	0.238095	3.2192
cla4	0.230769	3.1617		vma6	0.235955	3.24796		vma6	0.235955	3.24796
fus3	0.211538	3.13551		vma13	0.235955	3.2374		vma13	0.235955	3.2374
mkk2	0.238636	3.28037
opy2	0.211538	3.25234		MAP Kinase pathway:				MAP Kinase pathway:
pbs2	0.240741	3.08879		bck1	0.269231	3.50289		bck1	0.269231	3.50289
ptc1	0.25	3.15421		hog1	0.236842	3.06401		hog1	0.236842	3.06401
ste5	0.211538	3.1729		msb2	0.2	3.03775		msb2	0.2	3.03775
ste11	0.211538	3.15888		ptp3	0.241379	3.12621		ptp3	0.241379	3.12621
ste20	0.190476	3.8972		sho1	0.241935	3.13278		sho1	0.241935	3.13278
ste50	0.272727	3.35514		slt2	0.230769	2.72121		slt2	0.230769	2.72121
mRNA degradation:				mRNA degradation:				mRNA degradation:
ccr4	0.215569	3.13551		dhh1	0.192308	2.93361		dhh1	0.192308	2.93361
hpr1	0.220859	3.52766		ski3	0.247059	3.30801		ski3	0.247059	3.30801
lsm1	0.242775	2.84571		xrn1	0.241935	3.21291		xrn1	0.241935	3.21291
lsm6	0.242775	3.02804
				Lipid synthesis:				Lipid synthesis:
				hmg1	0.235955	3.10392		hmg1	0.235955	3.10392
Golgi & vesicle trafficking:				sur4	0.25	3.01391		sur4	0.25	3.01391
mnn2	0.232044	3.12766
las21	0.232044	3.12766		Transcription regulators:				Transcription regulators:
				hot1	0.241379	3.22038		hot1	0.241379	3.22038
Transcription regulators:				srb5	0.238636	3.35737		srb5	0.238636	3.35737
swi4	0.232044	3.13675		yta7	0.238636	3.35991		yta7	0.238636	3.35991
swi6	0.232044	3.13675
				Miscellanies:				Miscellanies:
Genes not present in the collection:				Rvs161	0.222222	3.24274		Rvs161	0.222222	3.24274
cdc39	0.230769	3.02804		rnq1	0.222222	3.24274		rnq1	0.222222	3.24274
kog1	0.234637	3.3625
lst8	0.234637	3.14953		Genes not present in the collection:				Genes not present in the collection:
ste12	0.238636	2.86598		acc1	0.235955	3.34819		acc1	0.235955	3.34819
fas1	0.232044	3.12766		cdc39	0.236842	3.34902		cdc39	0.236842	3.34902
fas2	0.232044	3.12766		cdc42	0.222222	3.3282		cdc42	0.222222	3.3282
				kog1	0.238095	3.45019		kog1	0.238095	3.45019
Total network	0.232044	3.12766		lst8	0.238095	3.29982		lst8	0.238095	3.29982
S.D.	0.0221715	0.189502		ste12	0.241379	3.27		ste12	0.241379	3.27
T-test	4.0657e-20	1.63938e-14		fas1	0.233333	3.24274		fas1	0.233333	3.24274
				fas2	0.233333	3.24274		fas2	0.233333	3.24274
Model	0.140909	2.65155
S.D	0.0104677	0.089486		Total network	0.233333	3.24274		Total network	0.233333	3.24274
				S.D.	0.0141237	0.160578		S.D.	0.0141237	0.160578
				T-test	3.01335e-27	5.36834e-07		T-test	3.01335e-27	5.36834e-07
				Model	0.08247	2.94413		Model	0.08247	2.94413
				S.D	0.00767885	0.147963		S.D	0.00767885	0.147963
