# Supplementary material for: Experimental and Computational Analysis of a Large Protein Network That Controls Fat Storage Reveals the Design Principles of a Signaling Network
Source: PLoS Comput Biol. 2015 May 28;11(5):e1004264. doi: 10.1371/journal.pcbi.1004264 (PMC4447291; doi:10.1371/journal.pcbi.1004264)
Supplement: S6 Table — (XLSX) [file pcbi.1004264.s011.xlsx]

## Sheet: Sheet1
Fat store degradation (see Figure 4A)
	Fat deg. Slope	Network Gg-P	Network L-P
wt (BY4730)	-0.856
Energy level detection:
mth1	-0.522	0.223749	3.24218
elm1	0.245	0.217262	3.19622
sak1	0.451	0.218345	3.19882
sip1	0.332	0.221359	3.20807
snf1	0.091	0.217085	3.25391
snf4	0.1	0.222113	3.18531
tos3	0.25	0.217262	3.19733
Autophagy:
atg5	0.023	0.222439	3.20305
tco89	-0.019	0.22499	3.21548
vma2	0.102	0.209514	3.23066
vma4	0.012	0.216617	3.17364
vma5	0.175	0.207831	3.19252
vma6	-0.022	0.210632	3.20289
vma7	-0.041	0.218935	3.17364
vma8	-0.022	0.221022	3.19141
vma11	0.031	0.220805	3.16809
vma13	-0.01	0.219219	3.25768
MAP Kinase pathway:
bck1	-0.543	0.228426	3.2662
bem1	-0.021	0.216595	3.34741
cla4	0.311	0.225773	3.23436
fus3	0.213	0.224846	3.27545
hog1	-0.445	0.221994	3.23251
kss1	-0.652	0.222	3.21436
mkk2	0.213	0.226815	3.22983
msb2	-0.854	0.223485	3.21881
opy2	-0.651	0.225875	3.23865
pbs2	0.012	0.225397	3.26472
ptc1	0.142	0.231472	3.23066
ptp3	0.123	0.227129	3.18222
sho1	0.009	0.23053	3.29323
slt2	0.1	0.214286	3.31431
ste5	0.332	0.211356	3.22806
ste11	0.334	0.217063	3.34136
ste20	0.29	0.222926	3.33214
ste50	0.041	0.227926	3.23214
mRNA degradation:
ccr4	-0.172	0.214286	3.20659
dhh1	0.031	0.203647	3.22162
eap1	0.151	0.220896	3.20733
hpr1	0.461	0.199785	3.23843
lsm1	0.491	0.219439	3.21288
pop2	-0.029	0.214934	3.21511
ski3	0.004	0.223749	3.21103
ssd1	0.003	0.230769	3.24176
xrn1	0.008	0.214751	3.30952
Ubiiquitin pathway:
bul1	0.051	0.222439	3.21045
mot2	0.391	0.212766	3.18569
mms22	0.014	0.221399	3.20881
Lipid synthesis:
hmg1	0.043	0.221574	3.17438
opi3	-0.031	0.221359	3.21045
sur4	0.033	0.221548	3.16324
Golgi & vesicle trafficking:
ent5	0.054	0.221992	3.2911
mnn2	0.432	0.221359	3.21045
las21	-0.12	0.223092	3.20067
scs2	0.022	0.223529	3.22067
vps16	0.345	0.222529	3.20252
vps51	-0.051	0.221359	3.21045
Transcription regulators:
ctk1	0.001	0.221884	3.22732
elp3	-0.191	0.221359	3.21045
hhf1	0.061	0.254446	3.43484
hmo1	-0.431	0.223214	3.20881
hot1	0.004	0.222552	3.21918
ino2	0.121	0.221359	3.21045
msn2	-0.081	0.224631	3.20326
sko1	0.043	0.227964	3.22473
snf2	-0.451	0.220322	3.21585
snf5	-0.214	0.218563	3.21029
snf6	0.0652	0.218478	3.20194
stp1	0.191	0.221359	3.21045
spt10	-0.004	0.225743	3.20844
swi4	-0.113	0.227226	3.22066
swi6	0.036	0.227223	3.23288
yta7	-0.008	0.226815	3.22732
Miscellanies:
ckb1	0.031	0.231003	3.25139
ice2	0.141	0.221359	3.21045
Rvs161	-0.239	0.227772	3.21807
rnq1	0.081	0.223529	3.19659
Genes not present in the collection:
acc1		0.225451	3.23568
cdc39		0.191766	3.23584
cdc42		0.22547	3.22806
fas1		0.221359	3.21045
fas2		0.221359	3.21045
kog1		0.222113	3.22732
lst8		0.219727	3.18586
ste12		0.225743	3.24176
Total network		0.221359	3.21045
S.D.		0.00741598	0.0426615
T-test		7.65672e-94	4.01737e-89
Model		0.100463	2.88102
S.D		0.00497876	0.0280917
Figure 4B				Figure 4C
	Network Gg-P	Network L-P			Network Gg-P	Network L-P
Energy level detection:				Energy level detection:
mth1	0.237705	3.84761		elm1	0.179487	3.26205
sak1	0.235772	3.85631		sak1	0.179487	3.26048
sip1	0.234637	3.85143
snf1	0.247706	3.85092		Autophagy:
snf4	0.233333	3.85294		tco89	0.159292	3.26205
tos3	0.233333	3.8926
				MAP Kinase pathway:
Autophagy:				bck1	0.2	3.04182
atg5	0.237647	3.85704		bem1	0.157895	3.16848
tco89	0.2	3.86274		cla4	0.151515	3.40964
vma2	0.195846	4.03846		fus3	0.18	3.75602
vma4	0.221591	3.85704		kss1	0.169811	3.57229
vma5	0.20354	3.88607		opy2	0.189189	3.4019
vma6	0.228169	3.86727		pbs2	0.194444	3.37952
vma7	0.233333	3.86019		ptp3	0.21	3.41368
vma8	0.233333	3.773		sho1	0.238636	3.00459
vma11	0.225434	3.84906		slt2	0.194444	3.10954
vma13	0.235772	3.82092		ste5	0.12766	3.43373
vps30	0.228169	3.88173		ste11	0.141176	3.59337
MAP Kinase pathway:				mRNA degradation:
hog1	0.228169	3.92163		dhh1	0.159292	3.38028
mkk2	0.235135	3.85341		hpr1	0.189189	3.39093
pbs2	0.231405	3.86939
ptc1	0.24	3.88607		Lipid synthesis:
slt2	0.252907	3.87928		hmg1	0.181034	3.26506
ste20	0.24234	3.96865		sur4	0.190909	3.22476
ste50	0.246459	3.90639
				Golgi & vesicle trafficking:
mRNA degradation:				vps16	0.189189	3.35179
ccr4	0.228814	3.90348		vps51	0.194444	3.37952
eap1	0.223881	3.88311
lsm1	0.230114	3.90348		Transcription regulators:
pop2	0.23796	3.87155		ctk1	0.182609	3.34109
ski3	0.251497	3.90929		hmo1	0.189287	3.29819
ssd1	0.230769	4.01321		ino2	0.184211	3.26807
xrn1	0.251497	3.86755		swi4	0.179487	3.26807
				yta7	0.180288	3.36975
Lipid synthesis:
opi3	0.228169	3.88173		Miscellanies:
				ckb1	0.179487	3.36313
Ubiiquitin pathway:				rnq1	0.179487	3.36313
bull1	0.235135	3.85341
mot2	0.231405	3.90276		Genes not present in the collection:
mms22	0.24234	3.90639		acc1	0.179487	3.36975
				cdc39	0.159292	3.38028
Golgi & vesicle trafficking:				cdc42	0.185567	3.41867
ent5	0.246459	3.85123		fas1	0.179487	3.36313
mnn2	0.234501	3.85123		fas2	0.179487	3.36313
las21	0.234501	3.85123		kog1	0.162162	3.05986
scs2	0.234501	3.85123		lst8	0.159292	3.26205
vps51	0.234501	3.85123		ste12	0.156422	3.43976
Transcription regulators:				Total network	0.179487	3.36313
hhf1	0.281633	4.40784		S.D.	0.0197184	0.145249
hot1	0.232687	3.91727		T-test	9.74021e-25	1.75209e-21
msn2	0.239669	3.94479
sko1	0.245614	3.98041		Model	0.0926103	2.87128
snf2	0.225434	3.91437		S.D.	0.00873	0.0673322
snf5	0.222857	3.90929
snf6	0.222857	3.90929
spt10	0.243017	3.84586
swi6	0.253644	3.96952
Miscellanies:
Rvs161	0.230769	3.8759
ice2	0.230114	3.91727
Genes not present in the collection:
acc1	0.235955	3.92453
cdc39	0.16	4.23295
cdc42	0.192222	3.92598
kog1	0.222222	3.73098
lst8	0.230769	3.83382
ste12	0.239316	3.9688
fas1	0.233333	3.85123
fas2	0.233333	3.85123
Total network	0.233333	3.85123
S.D.	0.016575	0.095029
T-test	5.52544e-56	1.55135e-65
Model	0.08247	2.87128
S.D.	0.003673	0.0673322
