# Supplementary material for: Experimental and Computational Analysis of a Large Protein Network That Controls Fat Storage Reveals the Design Principles of a Signaling Network
Source: PLoS Comput Biol. 2015 May 28;11(5):e1004264. doi: 10.1371/journal.pcbi.1004264 (PMC4447291; doi:10.1371/journal.pcbi.1004264)
Supplement: S7 Table — (XLSX) [file pcbi.1004264.s012.xlsx]

## Sheet: Sheet1
Figure 5A
		14C D-Glucose	T-test	Network Gg-P	Network L-P
		(Fat/Pellet)*99
wt (BY4730)		17.60 +/- 0.5
Energy level detection:
mth1		23.3 +/- 0.41	5.93778e-07	0.24612	3.55623
elm1		23.71 +/- 1.06	0.000187592	0.245033	3.49495
snf1		25.12 +/- 0.70	0.00299179	0.258741	3.47285
snf4		25.67 +/- 1.02	0.000141497	0.245033	3.49495
Autophagy:
tco89		22.25 +/- 0.23	0.000605774	0.240535	3.56498
vma2		30.10 +/- 1.20	0.0199911	0.235023	3.48876
vma4		20.50 +/- 0.10	0.0196342	0.240535	3.47475
vma6		22.23 +/- 1.00	0.00926895	0.238095	3.53805
vma7		22.31 +/- 0.15	0.000268947	0.238938	3.49156
vma8		41.20 +/- 1.22	0.000946089	0.237472	3.47138
vma11		23.07 +/- 0.07	0.00019471	0.243956	3.45589
vma13		25.80 +/- 0.02	0.0020878	0.240535	3.47475
MAP Kinase pathway:
bem1		23.47 +/- 0.87	0.00184113	0.244898	3.68701
cla4		22.08 +/- 1.4	0.00178388	0.244186	3.60539
hog1		30.01 +/- 0.06	5.5984e-05	0.248879	3.54343
kss1		21.68 +/- 0.02	0.000155984	0.252847	3.60028
mkk2		24.56 +/- 1.05	0.00978249	0.239726	3.58378
msb2		24.15 +/- 0.87	0.00489494	0.238749	3.53939
opy2		28.76 +/- 1.20	0.00481249	0.232394	3.54882
pbs2		25.52 +/- 1.04	0.000362888	0.256944	3.64377
ptc1		29.6 +/- 1.01	0.000556854	0.25058	3.55556
ptp3		33.34 +/- 1.20	0.000156854	0.248744	3.59724
sho1		22.98 +/- 0.74	0.00292926	0.257143	3.80202
slt2		29.54 +/- 1.06	0.00292926	0.257143	3.5596
ste20		23.07 +/- 1.08	0.0295986	0.237762	3.49293
mRNA degradation:
ccr4		28.91 +/- 0.41	0.000568955	0.226415	3.52795
dhh1		24.12 +/- 1.03	0.00941545	0.203883	3.52929
eap1		22.18 +/- 1.10	0.00889141	0.239726	3.53095
hpr1		30.01 +/- 0.91	1.40089e-05	0.185484	3.61145
pop2		21.31 +/- 0.12	1.30089e-05	0.22695	3.5899
xrn1		35.51 +/- 1.01	2.57958e-05	0.226563	3.61145
Ubiiquitin pathway:
bull1		22.61 +/- 0.41	0.000502949	0.243956	3.50842
mot2		27.12 +/- 1.01	0.000614403	0.219858	3.52121
mms22		38.91 +/- 1.51	6.21364e-06	0.243792	3.52096
Lipid synthesis:
hmg1		21.21 +/- 0.73	0.000349304	0.24612	3.53293
opi3		22.21 +/- 0.12	0.000373035	0.24183	3.52013
sur4		26.71 +/- 0.12	0.000370243	0.24612	3.53293
Golgi & vesicle trafficking:
ent5		23.61 +/- 1.02	0.00043123	0.24612	3.51246
Transcription regulators:
ctk1		23.76 +/- 1.01	0.00337572	0.243437	3.60974
hhf1		21.13 +/- 0.4	0.00398547	0.277955	3.76019
hmo1		23.01 +/- 0.01	0.000749331	0.243792	3.52256
hot1		26.78 +/- 0.23	0.000711497	0.245033	3.52862
ino2		37.75 +/- 3.21	0.000749716	0.234879	3.52349
msn2		25.71 +/- 0.78	0.000743306	0.24612	3.52121
srb5		27.81 +/- 0.91	0.00025414	0.245033	3.53167
spt10		24.01 +/- 0.02	0.00166322	0.249438	3.52189
swi4		22.41 +/- 0.5	0.00123663	0.242494	3.54478
swi6		21.5 +/- 0.12	4.43881e-05	0.247059	3.60808
yta7		22.12 +/- 0.09	0.00372215	0.244344	3.52593
Miscellanies:
ice2		37.61 +/- 1.3	4.05248e-06	0.24183	3.52013
Rvs161		23.11 +/- 0.10	0.00106669	0.253425	3.54647
Genes not present in the collection:
acc1				0.248276	3.54244
cdc39				0.183024	3.52322
cdc42				0.254118	3.61145
fas1				0.24183	3.52013
fas2				0.24183	3.52013
kog1				0.237885	3.59156
lst8				0.241071	3.48956
ste12				0.250564	3.78249
Total network				0.24183	3.52013
S.D.				0.0147011	0.0698588
T.Test				2.31232e-52	1.01768e-52
Model				0.100644	2.77156
S.D.				0.0129455	0.0528911
Figure 5B
		14C L-Aspartic	T-test	Network Gg-P	Network L-P
		(Fat/Pellet)*99
wt (BY4730)		4.10 +/- 0.11
Energy level detection:
sip1		6.90 +/- 0.09	0.000788308	0.285714	3.44097
snf1		5.90 +/- 0.10	0.00423137	0.258741	3.47285
snf4		6.61 +/- 0.12	0.00472231	0.245033	3.49495
Autophagy:
tco89		6.59 +/- 0.05	0.00794083	0.270903	3.54289
tor1		6.30 +/- 0.01	0.00615794	0.287234	3.71067
vma2		9.32 +/- 0.95	0.00235678	0.269784	3.58022
vma5		10.03 +/- 0.14	3.53406e-05	0.256849	3.45308
vma6		8.65 +/- 0.81	0.00144073	0.262626	3.45106
vma7		11.39 +/- 0.98	0.00112337	0.278146	3.42583
vma8		7.84 +/- 0.41	0.00145123	0.285246	3.46317
vma11		9.81 +/- 0.98	0.00820188	0.281553	3.4329
vma13		6.61 +/- 0.06	4.66048e-06	0.27551	3.56609
MAP Kinase pathway:
bem1		7.21 +/- 0.03	7.41038e-05	0.29097	3.6448
hog1		12.01 +/- 1.03	7.84206e-05	0.288462	3.45005
kss1		6.67 +/- 0.13	7.0585e-05	0.286624	3.45005
pbs2		7.03 +/- 0.97	7.41038e-05	0.289389	3.4662
ptc1		9.09 +/- 0.89	0.00247648	0.29703	3.50581
ptp3		6.16 +/- 0.09	0.0027325	0.292208	3.54849
slt2		9.88 +/- 0.99	0.00846203	0.297945	3.57013
ste11		6.16 +/- 0.15	0.00027325	0.27	3.889
ste20		6.63 +/- 0.23	0.0027325	0.297945	3.49293
mRNA degradation:
ccr4		8.42 +/- 0.32	0.0044	0.27	3.45913
eap1		6.10 +/- 0.12	0.00254554	0.285246	3.45308
hpr1		12.4 +/- 0.07	2.67874e-05	0.245353	3.49546
lsm1		7.43 +/- 0.64	0.00320266	0.274576	3.48133
pop2		7.81 +/- 0.06	0.00265655	0.288462	3.44803
ski3		8.72 +/- 0.72	0.00023833	0.289389	3.45005
xrn1		6.67 +/- 0.22	0.000303856	0.263736	3.50252
Ubiiquitin pathway:
mms22		10.87 +/- 0.80	0.000306353	0.243792
Lipid synthesis:
erg3		7.32 +/- 0.23	0.00138599	0.278846	3.43895
erg4		10.33 +/- 0.19	3.29036e-05	0.274778	3.39779
erg23		6.76 +/- 0.14	3.97327e-05	0.274785	3.39679
hmg1		6.58 +/-0.23	0.0100139	0.280645	3.47536
opi3		8.91 +/- 0.13	0.000131115	0.283912	3.47297
sur4		10.52 +/- 0.1	0.00083651	0.283912	3.47536
Golgi & vesicle trafficking:
scs2		9.97 +/- 0.80	0.000161101	0.24612	3.44895
sso1		10.07 +/- 0.9	0.000161101	0.24812	3.43895
vps16		7.62 +/- 0.76	0.000136528	0.28754	3.4551
Transcription regulators:
ctk1		7.91 +/- 0.11	3.63506e-05	0.253792	3.4884
hhf1		6.61 +/- 0.12	4.15812e-06	0.243792	4.18605
hmo1		10.25 +/- 0.13	1.58118e-06	0.386503	3.48234
ino2		11.85 +/- 1.01	4.9016e-06	0.298013	3.49314
snf2		6.31 +/- 0.03	0.00293661	0.274576	3.48436
snf5		11.56 +/- 0.81	0.00148746	0.274576	3.48436
snf6		7.81 +/-0.90	0.00115304	0.274576	3.43241
srb5		10.06 +/- 0.32	0.00143677	0.273983	3.50581
spt10		9.03 +/- 0.01	0.0146428	0.249438	3.44984
swi4		6.71 +/- 0.67	0.000790515	0.242494	3.54478
swi6		9.21 +/- 0.08	7.43705e-05	0.301003	3.60808
yta7		7.43 +/- 0.11	3.08085e-05	0.291946	3.52593
Genes not present in the collection:
acc1				0.29097	3.48436
cdc39				0.260377	3.47202
cdc42				0.260377	4.00807
fas1				0.283912	3.47297
fas2				0.283912	3.47297
kog1				0.270903	3.50252
lst8				0.266447	3.5349
ste12				0.266447	3.52472
Total network				0.283912	3.47297
S.D.				0.0216188	0.13544
T-test				3.2182e-51	1.88164e-30
Model				0.0951369	2.99888
S.D.				0.0061374	0.144987
