# Supplementary material for: Experimental and Computational Analysis of a Large Protein Network That Controls Fat Storage Reveals the Design Principles of a Signaling Network
Source: PLoS Comput Biol. 2015 May 28;11(5):e1004264. doi: 10.1371/journal.pcbi.1004264 (PMC4447291; doi:10.1371/journal.pcbi.1004264)
Supplement: S8 Table — (XLSX) [file pcbi.1004264.s013.xlsx]

## Sheet: Sheet1
		% of pathway used (fat added to mutant by drug relative to that added to wild-type, in %)
	10mM U0126	25 mM Rap	0.5% Ch.Qu	5mM Conc.A	50 mM Cer
mth1	17.45 +/- 9.52	32.26 +/- 0.052	103.84 +/- 10.2	52.96 +/- 2.99	69.76 +/- 2.29
elm1	109.37 +/- 1.29	116.88 +/- 2.533	23.2 +/- 3.85	N/D	39.72 +/- 10.11
sak1	23.47 +/- 0.87	35.01 +/- 2.13	8.62 +/- 2.1	2.1 +/- 2.68	54.72 +/- 4.7
sip1	-10.27 +/- 9	41.41 +/- 1.2	0.37 +/- 4.07	-3.4 +/- 5.04	16.56 +/- 9.6
snf1	1 +/- 1.86	56.47 +/- 1.58	78.13 +/- 2.37	N/D	44.15 +/- 1.45
snf4	-2.61 +/- 1.57	74.95 +/-1.3615	-7.95 +/- 1.244	N/D	12.94 +/-12.9
tos3	0.32 +/- 11	19.4 +/- 1.367	96.26 +/- 1.244	30.2 +/- 1.98	28.87 +/- 15.8
atg5	54.76 +/- 1.517	70.20 -/+ 1.6	5.47 +/- 1.244	-10.53 +/- 1.98	55.17 +/- 16.52
tco89	-8.91 +/- 1.89	1.12 +/- 1.317	-1.99 +/- 1.244	-9.19 +/- 1.98	94.98 +/- 10.1
tor1	-4.08	14.02 +/-	69.73 +/- 1.23	1.21 +/- 1.22	89.71 +/- 16.33
vma2	75.64 +/- 1.7	36.09 +/- 1.26	96.13 +/- 1.29	72.58 +/- 1.98	42.27 +/- 17.54
vma4	-2.37 +/- 1.7	111.5 +/- 1.36	N/D	116.41 +/- 5.21	12.91 +/-15 .43
vma5	1.65 +/- 1.57	43.28 +/- 1.23	-5.34 +/- 1.24	82.64 +/- 1.98	29.56 +/- 12.76
vma6	N/D	61.23 +/- 1.96	64.24 +/- 4.31	87.72 +/- 1.99	N/D
vma7	-0.08 +/- 1.97	40.70 +/- 1.98	0 +/- 1.95	86.07 +/- 1.96	47.41 +/-1.92
vma8	92.45 +/- 1.976	11.178 +/- 1.98	14.67 +/- 1.96	0 +/- 1.98	56.23 +/- 1.94
vma11	3.68 +/- 1.97	15.01 +/- 1.98	56.54 +/- 1.97	86.78 +/- 1.99	44.08 +/-1.95
vma13	-0.085 +/- 1.9	76.30 +/- 1.2	115.80 +/- 1.92	3.43 +/- 7.89	71.36 +/- 2.67
vps30	6.89 +/- 1.69	43.91 +/- 0.82	N/D	106.25 +/- 3.38	32.65 +/- 2.909
bck1	87.03 +/- 1.16	10 +/-0.89	-5.54 +/- 4.56	-5.13 +/- 1.17	49.74 +/- 4.71
bem1	-10.58 +/- 5.52	41.84 +/- 1.04	60.51 +/- 1.37	36.86 +/- 0.74	25.44 +/- 2.59
cla4	72.46 +/- 2.54	30.48 +/- 2.08	35.39 +/- 0.87	32.52 +/- 1.22	52.02 +/- 3.79
fus3	22.61 +/- 1.92	27.42 +/- 1.2	37.48 +/- 1.3	-7.11 +/- 1.59	58.59 +/- 9.21
hog1	4.85 +/- 2	5.51 +/- 4.29	34.90 +/- 2.19	4.24 +/- 1.69	33.15 +/- 3.63
kss1	109.91 +/- 2.53	34.86 +/- 1.91	71 +/- 2.21	-4.67 +/- 1.43	89.57 +/- 1.17
mkk2	-5.53 +/- 2.44	54.66 +/- 1.11	-13.06 +/- 1.81	-5 +/- 1.7	69.67 +/- 1.55
msb2	110.38 +/- 9.24	67.17 +/- 1.41	-18.02 +/- 6.54	-9.12 +/- 4.39	62.91 +/- 4.7
opy2	10.73 +/- 2.9	56.63 +/- 2.15	-9.79 +/- 4.09	19.16 +/- 5.09	20.75 +/- 12.49
pbs2	-10.18 +/- 1.24	5.74 +/-1.41	-10.41 +/- 8.99	N/D	58.47 +/- 4.7
ptc1	8.31 +/- 4.08	69.92 +/- 1.61	16.31 +/- 4.23	1.45 +/- 5.81	14.54 +/- 14.76
ptp3	117.91 +/- 10.2	62.43 +/- 1.21	-19.11 +/- 5.49	-14.53 +/- 1.99	36.27 +/- 4.51
sho1	-2.14 +/- 1.99	56.86 +/- 1.85	4.62 +/- 2.34	4.16 +/- 1.12	36.16 +/- 6.61
slt2	79.32 +/- 1.17	2.76 +/- 0.76	93.97 +/- 0.65	-9.14 +/- 1.56	32.08 +/- 9.08
ste5	1.84 +/- 1.99	16.88 +/- 1.85	-18.52 +/- 12.4	-5.32 +/- 1.14	89.44 +/- 6.63
ste11	56.71 +/- 1.14	48.18 +/- 2.08	2.19 +/- 3.12	-10.72 +/- 1.59	10.47 +/- 20
ste20	-3.98 +/- 10.2	27.56 +/- 0.75	109.73 +/- 2.3	6.70 +/- 5.67	73.08 +/- 3.87
ste50	5.42 +/0.91	34.14 +/- 9.2	93.86 +/- 1.76	2.98 +/- 4.52	41.10 +/- 6.87
ccr4	30.02 +/- 0.55	36.89 +/- 0.76	1.84 +/- 1.63	110.32 +/- 1.14	45.61 +/- 8.39
dhh1	-4.61 +/- 1.43	77.86 +/- 1.4	44.48 +/-1.45	99.67 +/- 0.93	54.13 +/- 3.35
eap1	-8.36 +/- 1.43	30.71 +/- 1.45	-7.09 +/- 0.93	40.60 +/-0.94	56.91 +/- 3.34
hpr1	81.36 +/- 2.3	22.91 +/- 1.69	32.42 +/- 1.69	111.66 +/-0.77	21.51 +/- 7.13
lsm1	79.87 +/- 3.67	102.59 +/- 2.31	108.79 +/- 0.77	-3.66 +/- 0.77	12.82 +/- 7.12
lsm6	-2.32 +/- 3.11	100.17 +/- 1.28	-1.65 +/- 2.86	-13.71 +/- 1.53	18.0 +/- 13.5
pan2	104.52 +/- 2.3	3.23 +/- 3.69	-5.52 +/- 1.67	36.09 +/- 0.77	24.41 +/- 7.14
pan3	101.02 +/- 3.07	8.81 +/- 1.03	20.25 +/- 1.73	-10.62 +/- 1.85	15.52 +/- 10.3
pop2	-3.44 +/- 5.56	33.91 +/- 2.18	-12.38 +/- 3.12	-2.33 +/- 1.46	20.11 +/- 11.3
ski3	-6.98 +/- 3.07	91.82 +/- 1.03	21.83 +/- 1.72	90.11 +/- 1.85	17.84 +/- 11.5
ssd1	109.75 +/- 1.66	37.47 +/- 1.69	105.35 +/- 1.75	45.97 +/- 3.22	78.10 +/- 5.71
xrn1	24.79 +/- 3.07	40.05 +/- 1.03	85.92 +/-1.72	-11.02 +/- 1.84	56.12 +/- 13.99
bull1	110.52 +/- 2.17	56.20 +/- 1.78	92.24 +/- 1.05	17.45 +/- 1.58	N/D
mot2	4.81 +/- 1.57	45.06 +/- 2.42	66.94 +/- 7.02	77.02 +/- 3.24	36.23 +/- 8.53
mms22	84.51 +/- 2.97	77.88 +/- 3.23	57.23 +/- 1.16	42.74 +/- 1.66	58.48 +/- 3.02
erg3	103.37 +/- 1.93	27.25 +/- 1.1	-3.63 +/- 3.91	84.15 +/- 1.27	33.66 +/- 8.32
erg4	54.88 +/- 2.91	-2.62 +/- 3.27	40.52 +/- 1.16	34.58 +/- 1.66	22.30 +/- 3.02
erg23	8.54 +/- 1.74	78.31 +/- 1.15	63.65 +/- 1.29	43.08 +/- 1.97	31.14 +/- 3.02
hmg1	3.67 +/- 5.96	25.84 +/-2.5	65.01 +/- 1.39	97.45 +/- 0.79	16.66 +/- 4.72
opi3	N/D	100.19 +/- 2.12	32.87 +/- 1.23	93.68 +/- 1.52	N/D
sur4	-0.50 +/- 1.23	21.56 +/- 4.1	4.39 +/- 1.42	4.10 +/- 1.23	4.07 +/- 2.23
ent5	-13.74 +/- 9.56	72.36 +/- 2.18	4.59 +/- 5.68	-6.18 +/- 4.66	12.70 +/- 12.99
mnn2	93.84 +/- 0.03	-0.69 +/- 10.2	-13.54 +/- 13.61	99.74 +/- 2.45	29.58 +/- 0.92
las21	-5.58 +/- 3.51	-2.12 +/- 6.04	-14.64 +/- 1.67	-11.10 +/-2.07	82.37 +/- 1.99
scs2	-10.55 +/- 6.99	28.27 +/- 10.22	-6.43 +/- 9.88	-7.51 +/- 4.88	31.08 +/- 11.2
sso1	-9.18 +/- 9.99	18.83 +/- 3.33	43.12 +/- 8.54	1.2 +/- 2.3	12.92 +/- 12.23
vps16	-1.95 +/- 13.5	25.04 +/- 6.65	42.77 +/-3.33	-10.57 +/- 5.53	57.12 +/- 4.98
vps51	N/D	-0.69 +/- 1.65	N/D	N/D	38.67 +/- 3.89
ctk1	-12.38 +/- 9.76	92.97 +/-1.15	63.82 +/- 1.45	6.74 +/- 1.21	N/D
elp3	42.12 +/- 2.33	16.58 +/- 1.17	95.73 +/- 1.67	80.27 +/- 1.23	35.51 +/- 4.31
hhf1	-2.84 +/- 2.98	40.69 +/- 2.54	19.87 +/- 2.46	21.33 +/- 0.86	52.83 +/- 8.09
hmo1	-11.36 +/- 3.21	-1.89 +/- 3.84	64.90 +/- 1.7	105.37 +/- 1.5	44.32 +/- 8.61
hot1	31.88 +/- 2.99	111.72 +/- 10.34	3.89 +/- 2.56	43.65 +/- 0.82	24.50 +/- 8.91
ino2	-7.52 +/- 1.23	4.39 +/- 0.51	4.23 +/- 1.30	1.44 +/- 0.38	57.68 +/- 0.92
msn2	117.26 +/- 9.98	57.53 +/- 1.38	2.53 +/- 1.77	-14.53 +/- 1.77	55.75 +/- 4.56
sko1	-3.48 +/- 2.99	24.37 +/- 2.54	-12.18 +/- 2.45	-14.66 +/- 0.87	33.60 +/- 8.56
snf2	-5.99 +/- 1.99	50.45 +/- 3.71	104.52 +/- 0.87	70.13 +/- 1.23	30.68 +/- 10.01
snf5	42.41 +/- 9.42	59.58 +/- 2.22	47.49 +/- 1.22	83.96 +/- 12.3	36.11 +/- 6.34
snf6	84.75 +/- 2.22	94.69 +/- 6.62	-2.53 +/- 1.34	1.70 +/- 1.23	63.48 +/- 10.65
srb5	-15.69 +/- 12.71	51.05 +/- 2.34	4.22 +/- 1.56	71.59 +/- 5.89	79.27 +/- 9.43
stp1	3.78 +/- 3.21	18.90 +/- 2.33	-8.06 +/- 1.23	-9.98 +/- 2.12	23.69 +/- 8.91
spt10	5.22 +/- 2.21	6.27 +/- 1.56	-8.35 +/- 2.31	-1.45 +/- 1.23	38.07 +/- 2.34
swi4	-1.83 +/- 1.91	-0.69 +/- 1.2	N/D	N/D	42.70 +/- 12.34
swi6	-10.29 +/- 11.2	43.30 +/- 1.34	-18.65 +/- 11.34	-13.91 +/- 11.23	36.89 +/- 3.45
yta7	3.11 +/- 2.31	22.98 +/- 2.41	-9.60 +/- 10.23	-11.65 +/- 11.23	49.91 +/- 8.88
ckb1	96.45 +/- 1.23	20.64 +/- 3.11	82.55 +/- 1.34	100.33 +/- 3.31	78.62 +/- 7.88
ice2	1.021 +/- 4.31	13.90 +/- 1.87	29.61 +/- 1.23	47.54 +/- 2.12	83.23 +/- 9.99
Rvs161	16.43 +/- 1.61	-11.85 +/- 8.88	4.19 +/- 3.33	113.68 +/- 1.98	36.78 +/- 10.23
rnq1	2.01 +/- 3.2	50.38 +/- 4.51	-4.52 +/- 2.31	3.01 +/- 2.12	68.16 +/- 4.67
acc1	N/D	N/D	N/D	N/D	N/D
cdc39	N/D	N/D	N/D	N/D	N/D
cdc42	N/D	N/D	N/D	N/D	N/D
fas1	N/D	N/D	N/D	N/D	N/D
fas2	N/D	N/D	N/D	N/D	N/D
kog1	N/D	N/D	N/D	N/D	N/D
lst8	N/D	N/D	N/D	N/D	N/D
ste12	N/D	N/D	N/D	N/D	N/D
