# Supplementary material for: Experimental and Computational Analysis of a Large Protein Network That Controls Fat Storage Reveals the Design Principles of a Signaling Network
Source: PLoS Comput Biol. 2015 May 28;11(5):e1004264. doi: 10.1371/journal.pcbi.1004264 (PMC4447291; doi:10.1371/journal.pcbi.1004264)
Supplement: S9 Table — (XLSX) [file pcbi.1004264.s014.xlsx]

## Sheet: Sheet1
	U0126				Rapamycin				Ch.Q				Con.A
	Network Gg-P	Network L-P			Network Gg-P	Network L-P			Network Gg-P	Network L-P			Network Gg-P	Network L-P
snf1	0.188153	3.36314		tco89	0	2.04		sak1	0.1875	3.648		sak1	0.282511	3.48988
sip1	0.184466	3.52636		kog1	0	1.6		sip1	0.190476	3.72076		sip1	0.286364	3.33934
snf4	0.175896	3.52729		lst8	0.25	1.92		snf4	0.190476	3.72076		snf1	0.282511	3.48988
tos3	0.184466	3.52636		tor1	0.428571	1.57143		yta7	0.223881	3.69403		yta7	0.293023	3.34281
acc1	0.19322	3.59852		vma6	0.333333	2		atg5	0.223881	3.72034		vma8	0.282511	3.40398
ctk1	0.200669	3.58649		vma8	0.333333	2		vma5	0.223881	3.82984		vma13	0.288991	3.37931
msn2,	0.192308	3.52544		bck1	0.428571	1.57895		vma7	0.223881	3.81748		scs2	0.28125	3.46964
swi6,	0.184931	3.65869		hog1	0.352941	2.03448		vma8	0.220588	3.68773		ste20	0.284742	3.4828
tco89	0.172881	3.6124		pbs2	0.352941	2.03448		scs2	0.169811	3.5689		lst8	0.282511	3.52092
ptc1	0.185328	3.74653		mkk2	0.352941	1.72		lst8	0.217391	3.21033		kog1	0.291667	3.52916
kog1	0.170569	3.61332		rvs161	0.4	1.84		kog1	0.241935	4.136		tco89	0.287671	3.57355
lst8,	0.167763	3.56984		slt2	0.352941	2.33333		bck1	0.217391	3.6768		ptc1	0.314917	3.77525
vma4	0.171185	3.60138		swi4	0.352941	2.33333		pop2	0.254237	3.84757		bck1	0.29703	3.95412
vma5	0.191083	3.30707		pan2	0.352941	2.33333		mkk2	0.234375	3.83759		pop2	0.263415	3.5695
vma7,	0.189873	3.47271		pan3	0.352941	2.33333		cdc42	0.234375	3.82757		mkk2	0.288461	3.60597
vma13	0.193548	3.27292		erg4	0.352941	2.33333		sho1	0.254237	3.83757		slt2	0.31579	3.49291
ste20	0.173285	3.28163		ino2	0.352941	2.33333		mkk2	0.25	3.68894		xrn1	0.252809	3.94168
pop2	0.173857	3.58287		las21	0.352941	2.33333		opy2	0.227273	3.676		cdc42	0.291262	3.60324
bem1	0.188811	3.52222		spt10	0.352941	2.33333		bul1	0.25	3.90393		sho1	0.308571	3.8003
cdc42	0.188192	3.77891		ice2	0.352941	2.33333		rnq1	0.196721	3.62		ste50	0.310345	3.93077
pbs2	0.184931	3.57539						pbs2	0.2	3.46725		kss1	0.279412	3.60054
ste5	0.169014	3.58094						ste5	0.234375	3.612		ptc1	0.274193	3.62753
scs2,	0.191693	3.53839						ste11	0.234375	3.612		ste11	0.288136	3.633
vps16	0.191693	3.53839		Total network	0.352941	2.33333		sur4	0.2	3.55458		ste12	0.298246	3.69701
cla4	0.201413	3.57778		S.D.	0.112483	0.277997		las21	0.163636	3.92		opy2	0.283784	3.5587
sho1	0.188811	3.52525		T-test				cdc39	0.220588	3.69517		rnq1	0.287671	3.5722
ste50	0.192747	3.5492						ccr4	0.220588	3.68519		slt2	0.288991	3.57085
hhf1	0.246377	4.13843		Model	0.22	1.12948		hot1	0.220588	3.68519		ptp3	0.288991	3.57085
ste11	0.193548	3.53333		S.D.	0.0163	0.01473		msn2	0.20339	3.40191		sur4,	0.290323	3.4063
hog1	0.180212	3.56135						sko1	0.227273	3.576		las21	0.287671	3.5722
sko1	0.208333	3.57778						tor1	0.227273	3.576		sko1	0.201031	3.58839
mkk2	0.196078	3.48384						lst8	0.2	3.52153		swi6	0.201031	3.58839
slt2	0.209559	3.52212						tco89	0.223881	3.64		cdc39	0.229592	3.68826
ste12	0.19544	3.53333						tor1	0.220588	3.68773		dhh1	0.288991	3.63833
swi4	0.186851	3.56908						rvs161	0.223881	3.54		lsm1	0.287671	3.5722
yta7	0.194539	3.57101						lsm6	0.217391	3.66912		acc1	0.282511	3.42105
cdc39	0.196552	3.66061						srb5	0.217391	3.66912		ctk1	0.28125	3.47773
dhh1	0.161616	3.56059						mnn2	0.217391	3.66912		hot1	0.290323	3.4063
lsm1	0.193548	3.5198						stp1	0.217391	3.66912		msn2	0.28	3.57436
snf2	0.199335	3.55266						spt10	0.217391	3.66912		sko1	0.28	3.57436
hmo1	0.189103	3.57362										lsm6	0.28	3.57436
tor1	0.1875	3.62929										stp1	0.28	3.57436
sso1	0.194805	3.53044						Total network	0.217391	3.66912
sur4	0.194175	3.51111						S.D.	0.0201077	0.151317
lsm6	0.186885	3.40707										Total network	0.28	3.57436
mot2	0.192926	3.45507						Model	0.108172	1.3492		S.D.	0.0230103	0.142218
spt10	0.199335	3.55266						S.D.	0.01801	0.01462		Model	0.1611	0.1321
ice2	0.243948	3.31243										S.D.	0.011	0.012
vps30	0.243948	3.31243
Total network	0.243948	3.31243
S.D.	0.0169259	0.134724
Network model	0.138336	1.32
S.D.	0.01598	0.1732
